# Supplementary figures and images for: Er3+ doped nanoparticles as upconversion thermometer probes in confined fluids
Source: Royal Society of Chemistry journal article supplement (doi:10.1039/d3cp02218h), 2023-01-01

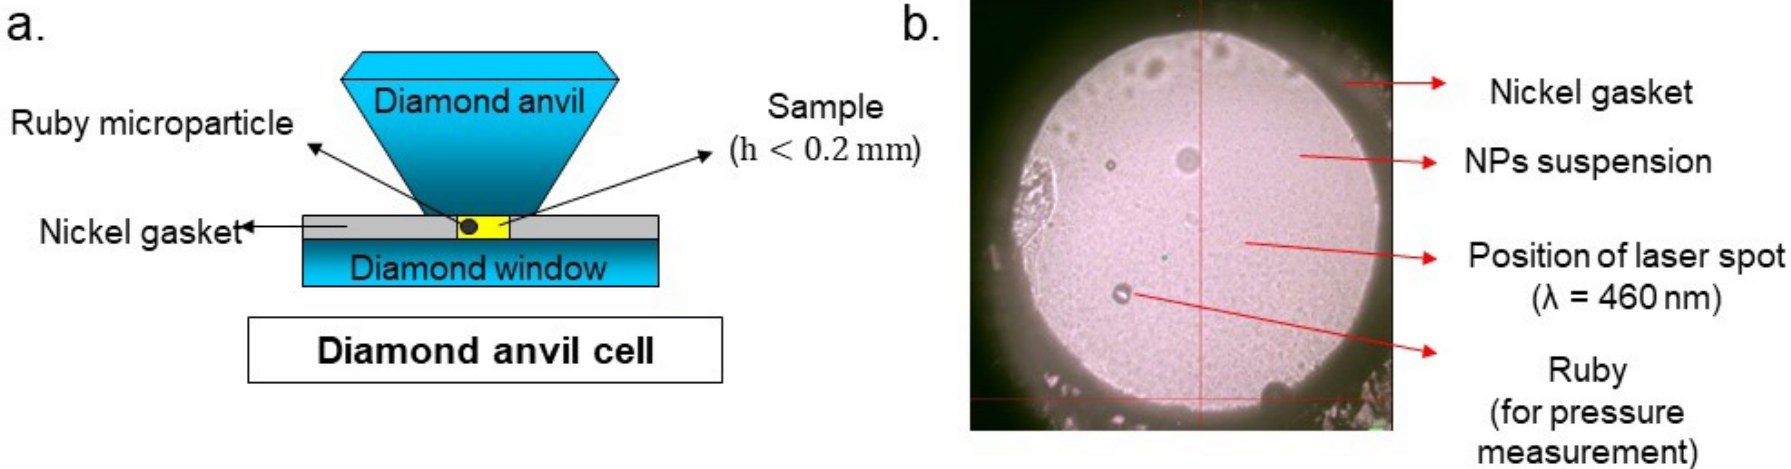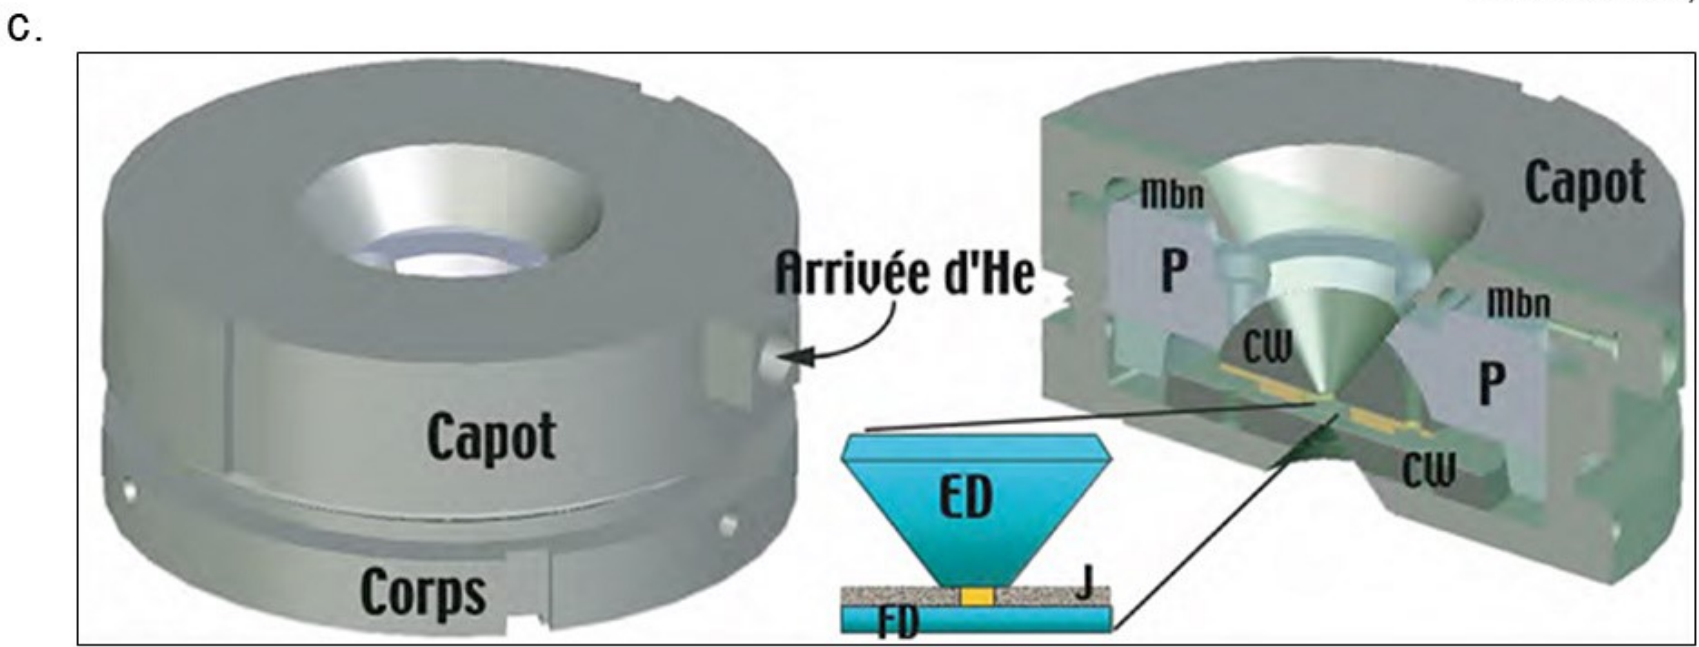

Supplement: d3cp02218h2.pdf [file d3cp02218h2.pdf]

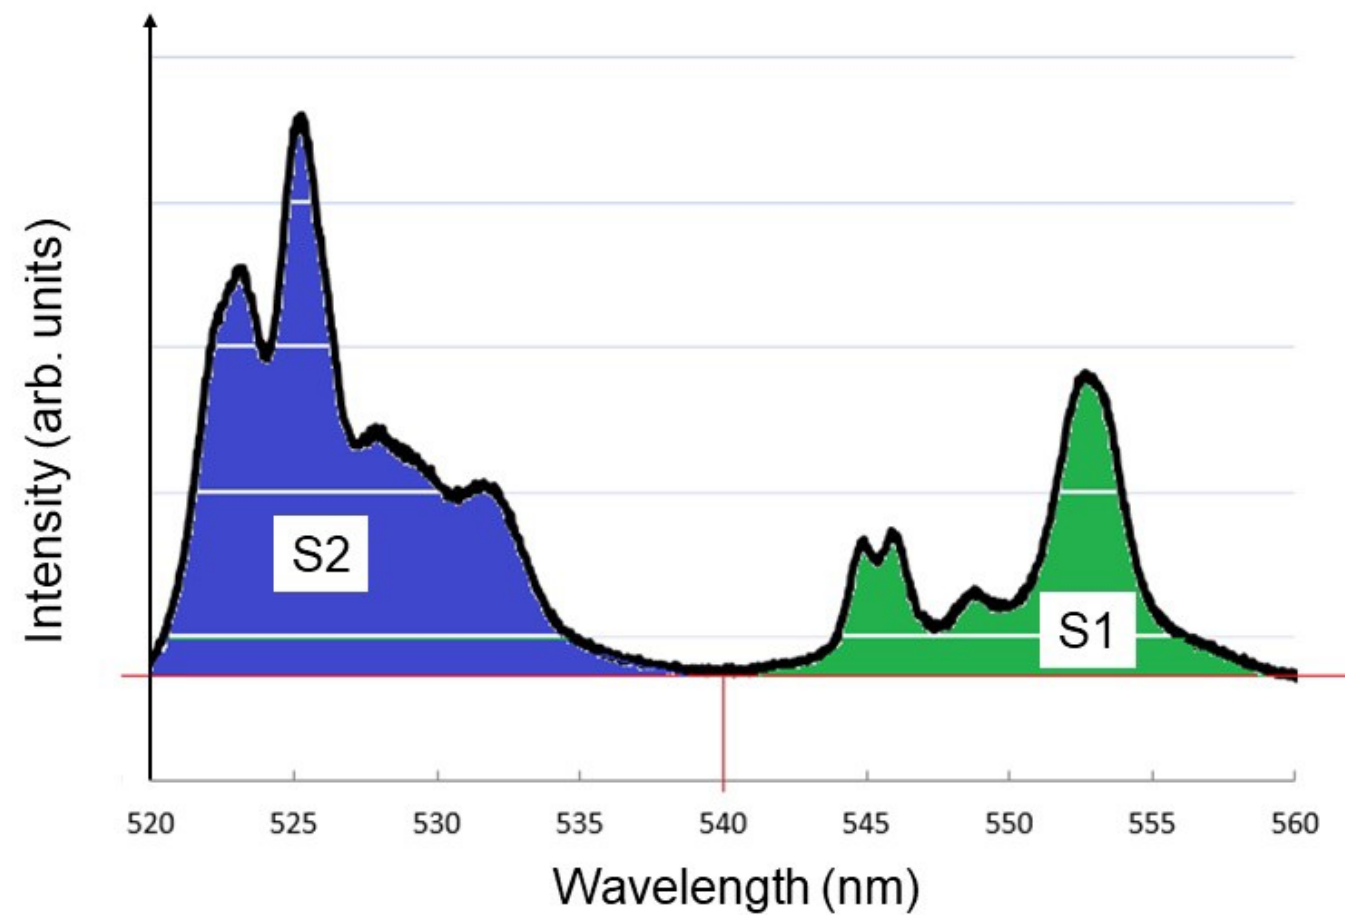

Supplement: d3cp02218h3.pdf [file d3cp02218h3.pdf]
